# Supplementary material for: A new global surface temperature reconstruction for the Last Glacial Maximum
Source: Copernicus journal article supplement (doi:10.5194/cp-18-1883-2022), 2022-08-18
Supplement: Supplementary file 1 [file cp-18-1883-2022-supplement.zip]

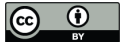

## *Supplement of*

# **A new global surface temperature reconstruction for the Last Glacial Maximum**

**James D. Annan et al.**

*Correspondence to:* James D. Annan ([jdannan@blueskiesresearch.org.uk](mailto:jdannan@blueskiesresearch.org.uk))

- cp-18-1883-2022-supplement-title-page.pdf
- .\_paleo\_enkf\_LGM.Rmd
- .\_readme.txt
- data
  - .DS\_Store
  - .\_DS\_Store
  - LGM
    - \* .\_MARGOplus\_values\_2.txt
    - \* .\_Margo\_LGM\_tos.nc
    - \* .\_Quantrecplus\_values\_2\_exclpts\_newdata.txt
    - \* .\_Tierney.absolute.lgm.nc
    - \* .\_Tierney2020\_ProxyData\_5x5\_deltaSST.nc
    - \* MARGOplus\_values\_2.txt
    - \* Margo\_LGM\_tos.nc
    - \* PaxHeader
    - \* Quantrecplus\_values\_2\_exclpts\_newdata.txt
    - \* Tierney.absolute.lgm.nc
    - \* Tierney2020\_ProxyData\_5x5\_deltaSST.nc
  - PaxHeader
    - \* .DS\_Store
  - modern
    - \* .\_ERSST.tos.1854\_1883.ann.nc
    - \* ERSST.tos.1854\_1883.ann.nc
- models
  - .DS\_Store

- .\_DS\_Store
- .\_finalmodelnames.txt
- .\_pairs.txt
- LGM\_PMIP2
  - \* .\_tas.all.nc
  - \* .\_tos.all.nc
  - \* tas.all.nc
  - \* tos.all.nc
- LGM\_PMIP3
  - \* .\_tas.all.nc
  - \* .\_tos.all.nc
  - \* tas.all.nc
  - \* tos.all.nc
- LGM\_PMIP4\_JY
  - \* .\_tas.all.nc
  - \* .\_tos.all.nc
  - \* PaxHeader
  - \* tas.all.nc
  - \* tos.all.nc
- PaxHeader
  - \* .DS\_Store
  - \* finalmodelnames.txt
  - \* pairs.txt
- finalmodelnames.txt
- pairs.txt
- output
  - SAT.all.lgm.nc
  - SAT.mean.lgm.nc
  - SAT.sd.lgm.nc
  - SST.all.lgm.nc
  - SST.mean.lgm.nc
  - SST.sd.lgm.nc
- paleo\_enkf\_LGM.Rmd
- readme.txt

The copyright of individual parts of the supplement might differ from the article licence.
